# Supplementary material for: Comprehensive high-throughput arrays for relative methylation (CHARM)
Source: HighWire-hosted journal article supplement (doi:10.1101/gr.7301508), 2008-03-03
Supplement: Supplemental_Figures_LEGENDS.pdf [file Supplemental_Figures_LEGENDS.pdf]

## Supplemental Figure Legends

**Supplemental Figure 1.** McrBC methodology recommends dye-swaps. This implies an extra hybridization for each sample. We found that dye-swaps do not provide enough of an improvement to justify the costs. By averaging the dye-swaps the precision assessment, reported for the case that did not use dye-swaps in Table 3, yielded SDs of 0.30 and 0.35 for the DKO and HCT116 samples respectively. The correlation with Illumina ranged from 0.65 to 0.68. These results provide only a slight improvement over those obtained without the use of dye-swaps. The plot shown here is like Figure 2 but uses  $M$  values that are averages of the dye-swaps.

**Supplemental Figure 2.** Box-plots of the differences between replicate  $M$  values for each method. The first four orange box-plots compare the McrBC when dye-swaps are used. The first two are from DKO and the latter two are from HCT116. The next four orange box-plots compare McrBC when dye-swaps are not used. The first two are from DKO and the latter two are from HCT116. The last two orange box-plots compare McrBC using the promoter tiling array. The first is from DKO and the second is from HCT116. The first two green box-plots compare the HELP method on the canonical array design. The first is from DKO and the second is from HCT116. The next two green box-plots compare the HELP method using the promoter tiling array. The first is from DKO and the second is from HCT116. The purple box-plots compare the MeDIP method. The first is from DKO and the second is from HCT116.

**Supplemental Figure 3.** Pyrosequencing analysis of regions showing differences between the tested methods and the Illumina reference standard. The Illumina data were correct in all cases.

**Supplemental Figure 4.** Results for all the hybridizations in our experiment that used the canonical arrays. Data format is the same as Figure 2.

**Supplemental Figure 5.** As Figure 4 for five other regions.

**Supplemental Figure 6.** As Figure 5, but we divide the Illumina regions into those with observed to expected CpG above 6 (inside CpG island) and below 6 (outside CpG island).
